# Supplementary material for: The influence of the Municipal Human Development Index and maternal education on infant mortality: an investigation in a retrospective cohort study in the extreme south of Brazil
Source: Research Square preprint supplement (doi:10.21203/rs.3.rs-29481/v3), 2020-12-16
Supplement: Supplementary file 1 [file 5d38108d8fff8e1410daa0b8.docx]

**Additional File 4**

Graphic 1.Infant Mortality Rate per thousand live births according to the Municipal Human Development Index (MHDI) classification in Porto Alegre from 2000 to 2017.

*MHDI: Municipal Human Development Index.*

*The MHDI is an index used in Brazil that allows to know the reality of human development in the Brazilian territory.* *It is previously calculated and established by the United Nations Development Program Brazil (UNDP Brazil), the Institute for Applied Economic Research (IPEA) and the João Pinheiro Foundation*

**Medium: IDHM 0.6-0.699; High: IDHM 0.7-0.799; Very high: IDHM 0.8-1.0.*
